# Supplementary material
Source: PubMed Central journal article supplement (PMC5395124)
Supplement: 2016.153957.GOKBUGET_SUPPL.pdf [file 2016.153957.GOKBUGET_SUPPL.pdf]

**Long-term relapse-free survival in a phase 2 study of blinatumomab for the treatment of patients with minimal residual disease in B-lineage acute lymphoblastic leukemia**

Nicola Gökbüget,<sup>1\*</sup> Gerhard Zugmaier,<sup>2\*</sup> Matthias Klinger,<sup>2</sup> Peter Kufer,<sup>2</sup> Matthias Stelljes,<sup>3</sup> Andreas Viardot,<sup>4</sup> Heinz A. Horst,<sup>5</sup> Svenja Neumann,<sup>5</sup> Monika Brüggemann,<sup>5</sup> Oliver G. Ottmann,<sup>6</sup> Thomas Burmeister,<sup>7</sup> Dorothea Wessiepe,<sup>8</sup> Max S. Topp<sup>9\*\*</sup> and Ralf Bargou<sup>10\*\*</sup>

*\*Shared responsibility for lead authorship, \*\*shared responsibility for senior authorship*

<sup>1</sup>Center of Internal Medicine, Goethe University, Frankfurt, Germany; <sup>2</sup>Amgen Research (Munich) GmbH, Germany; <sup>3</sup>Medical Department A, University of Münster, Germany; <sup>4</sup>Department for Internal Medicine III, University Ulm, Germany; <sup>5</sup>Medical Department II, Christian-Albrechts University, Kiel, Germany; <sup>6</sup>Department of Haematology, Cardiff University, Cardiff, UK; <sup>7</sup>Department for Hematology and Oncology and Tumor Immunology, Charité-Universitätsmedizin Berlin, Campus Benjamin Franklin, Berlin, Germany; <sup>8</sup>Metronomia Clinical Research GmbH, München, Germany; <sup>9</sup>Department of Internal Medicine II, Universitätsklinikum, Würzburg, Germany and <sup>10</sup>Comprehensive Cancer Center Mainfranken, Universitätsklinikum Würzburg, Germany

Correspondence: gerhardz@amgen.com.  
doi:10.3324/haematol.2016.153957

**Long-term relapse-free survival in a phase 2 study of blinatumomab for the treatment of patients with minimal residual disease in B-lineage acute lymphoblastic leukemia**

Nicola Gökbüget, Gerhard Zugmaier, Matthias Klinger, Peter Kufer, Matthias Stelljes, Andreas Viardot, Heinz A. Horst, Svenja Neumann, Monika Brüggemann, Oliver G. Ottmann, Thomas Burmeister, Dorothea Wessiepe, Max S. Topp, and Ralf Bargou

**SUPPLEMENTAL DATA**

**Online Supplementary Figure S1. CD3<sup>+</sup> T-cell expansion during cycle 1 of blinatumomab treatment (study day 0 to 28) and during the subsequent 2-week treatment-free interval (study day 35). Evaluable patients (N=20) were grouped according to duration of relapse-free survival (RFS) (<5 versus ≥5 years; n=10 each). Data shown are median (interquartile range) cell values. For clarity, initial T-cell redistribution during the first week of cycle 1 is not shown.**

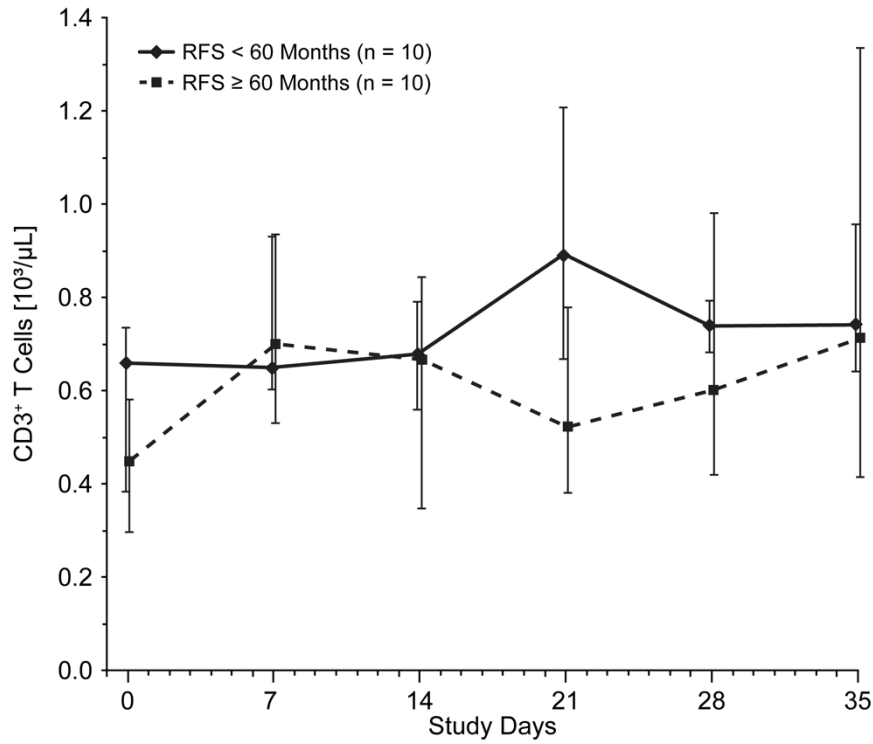

Online Supplementary Figure S2. CD3<sup>+</sup> T-cell expansion as baseline-adjusted area under the T-cell curve (AUC baseline) versus initial minimal residual disease (MRD) level.

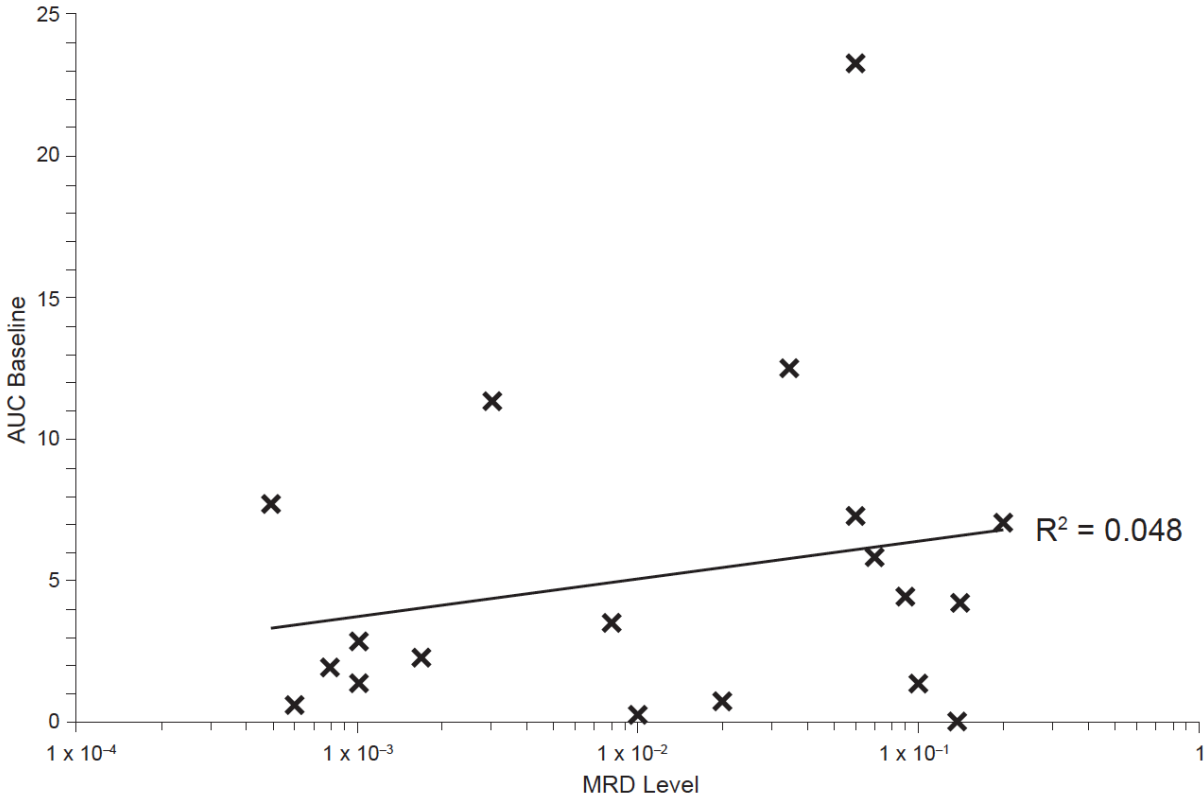

**Online Supplementary Figure S3. Key outcomes from each study analysis.**

alloHSCT: allogeneic hematopoietic stem cell transplantation; MRD: minimal residual disease; mo: months; RFS: relapse-free survival. \*Number of evaluable patients. †MRD response within the first 4 cycles was defined as *BCR-ABL* or *MLL-AF4* below the detection limit or individual rearrangements of immunoglobulin or T-cell receptor genes  $<10^{-4}$ ; all MRD responses occurred in the first cycle of blinatumomab treatment.

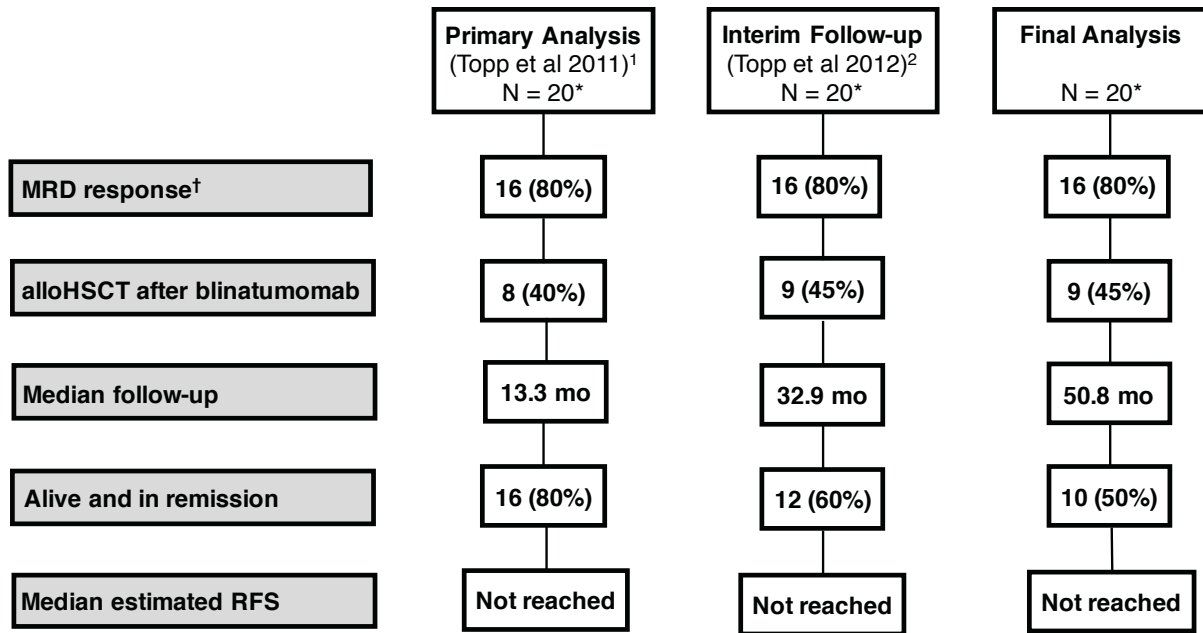

**Online Supplementary Table S1. Baseline characteristics and treatment outcome by alloHSCT after blinatumomab**

|                                            | alloHSCT<br>(n=9) | No alloHSCT<br>(n=11) |
|--------------------------------------------|-------------------|-----------------------|
| Sex, n (%)                                 |                   |                       |
| Male                                       | 5 (56)            | 3 (27)                |
| Female                                     | 4 (44)            | 8 (73)                |
| Age, years, median (range)                 | 31 (20-47)        | 65 (42-77)            |
| Prior consolidation II, n (%)              | 3 (33)            | 8 (73)                |
| Disease status, n (%)                      |                   |                       |
| Molecular relapse in CR1                   | 1 (11)            | 3 (27)                |
| Molecular relapse in CR2+                  | 1 (11)            | 0 (0)                 |
| Molecular failure in CR1                   | 7 (78)            | 8 (73)                |
| Molecular failure in CR2+                  | 0 (0)             | 0 (0)                 |
| MRD status, n (%)                          |                   |                       |
| MRD <10 <sup>-3</sup>                      | 2 (22)            | 2 (18)                |
| MRD ≥10 <sup>-3</sup>                      | 7 (78)            | 9 (82)                |
| Method for MRD evaluation, n (%)*          |                   |                       |
| Ig/TCR rearrangements                      | 7 (78)            | 9 (82)                |
| <i>BCR-ABL</i> PCR translocations          | 1 (11)            | 4 (36)                |
| <i>MLL-AF4</i> PCR translocations          | 1 (11)            | 1 (9)                 |
| Number of blinatumomab cycles, median      | 2.0               | 4.0                   |
| Complete MRD response after 1 cycle, n (%) | 7 (78)            | 9 (82)                |
| RFS, months, median (range)                | 59.5 (12.4-65.8)  | 44.3 (1.4-70.1)       |

\*Patients could have both rearrangements and translocations.

alloHSCT: allogeneic hematopoietic stem cell transplantation; CR1: first hematologic complete remission; CR2+: second or greater hematologic CR; Ig: immunoglobulin; MRD: minimal residual disease; PCR: polymerase chain reaction; RFS: relapse-free survival; TCR: T-cell receptor.

**Online Supplementary Table S2. Serum immunoglobulin levels of individual long-term survivors at screening and last follow-up (modified from Zugmaier et al, 2014)<sup>3</sup>**

| Patient | Ph     |                       | IgA      | IgG        | IgM      | TKI After              |
|---------|--------|-----------------------|----------|------------|----------|------------------------|
|         | Status | Statistic             |          |            |          | Blinatumomab           |
| 13      | Ph–    | Screening, mg/dL      | 217      | 629        | 66       | None                   |
|         |        | Last follow-up, mg/dL | 13       | 250        | 49       |                        |
|         |        | % Change*             | –94%     | –60%       | –26%     |                        |
| 15      | Ph–    | Screening, mg/dL      | 58       | 457        | 111      | None                   |
|         |        | Last follow-up, mg/dL | 37       | 320        | 72       |                        |
|         |        | % Change*             | –36%     | –30%       | –35%     |                        |
| 16      | Ph–    | Screening, mg/dL      | 132      | 830        | 103      | None                   |
|         |        | Last follow-up, mg/dL | 58       | 801        | 100      |                        |
|         |        | % Change*             | –56%     | –3%        | –3%      |                        |
| 18      | Ph–    | Screening, mg/dL      | 64       | 700        | 58       | None                   |
|         |        | Last follow-up, mg/dL | 30       | 789        | 137      |                        |
|         |        | % Change*             | –53%     | +13%       | +136%    |                        |
| 20      | Ph +   | Screening, mg/dL      | 54       | 330        | 31       | Imatinib,<br>dasatinib |
|         |        | Last follow-up, mg/dL | 26       | 333        | 14       |                        |
|         |        | % Change*             | –52%     | +1%        | –55%     |                        |
| 9       | Ph+    | Screening, mg/dL      | 178      | 696        | 38       | Imatinib               |
|         |        | Last follow-up, mg/dL | 63       | 487        | 36       |                        |
|         |        | % Change*             | –65%     | –30%       | –5%      |                        |
|         |        | Reference range       | (70–400) | (700–1600) | (40–230) |                        |

\* The original publication<sup>3</sup> reported final percentages relative to the value at screening; the percent change shown here represents the change from screening to last follow-up. “Screening” refers to baseline.

TKI: tyrosine kinase inhibitor.

## REFERENCES

1. Topp MS, Kufer P, Gökbuget N, et al. Targeted therapy with the T-cell-engaging antibody blinatumomab of chemotherapy-refractory minimal residual disease in B-lineage acute lymphoblastic leukemia patients results in high response rate and prolonged leukemia-free survival. *J Clin Oncol*. 2011;29(18):2493-2498.
2. Topp MS, Gökbuget N, Zugmaier G, et al. Long-term follow-up of hematologic relapse-free survival in a phase 2 study of blinatumomab in patients with MRD in B-lineage ALL. *Blood*. 2012;120(26):5185-5187.
3. Zugmaier G, Topp MS, Alekar S, et al. Long-term follow-up of serum immunoglobulin levels in blinatumomab-treated patients with minimal residual disease-positive B-precursor acute lymphoblastic leukemia. *Blood Cancer J*. 2014;4(9):244.
